# Supplementary material for: Observation of isotropic–isotropic demixing in colloidal platelet–sphere mixtures
Source: Royal Society of Chemistry journal article supplement (doi:10.1039/c5sm00615e), 2015-01-01
Supplement: c5sm00615e1.pdf [file c5sm00615e1.pdf]

## Supplementary Information

# Observation of Isotropic-Isotropic Demixing in Colloidal Platelet-Sphere Mixtures

Mingfeng Chen<sup>1</sup>, Huawei Li<sup>1</sup>, Ying Chen<sup>1</sup>, Andres Mejia<sup>2,3</sup>, Xuezheng Wang<sup>2,3</sup>, Zhengdong Cheng\*<sup>2,3,4</sup>,

<sup>1</sup> Soft Matter Center, Guangdong Provincial Key Laboratory on Functional Soft Condensed Matter, School of Materials and Energy, Guangdong University of Technology, Guangzhou, 510006, China

<sup>2</sup> Artie McFerrin Department of Chemical Engineering, Texas A&M University, College Station, TX, 77843-3122, USA.

<sup>3</sup> Mary Kay O'Connor Process Safety Center, Artie McFerrin Department of Chemical Engineering, Texas A&M University, College Station, TX, 77843-3122, USA

<sup>4</sup> Materials Science and Engineering, Texas A&M University, College Station, TX, 77843-3003, USA

### The observation of different phases by SEM

As shown in Figure S1, SEM graphs of different phases were obtained. Samples were taken out by syringe from the vial. Fig.S1 (a), (b) and (c) correspond to  $I_2$ , N and  $I_1$ , respectively, of the right vial shown in Fig 3b. The platelets were stacked due to drying. However, we can still notice that the  $I_2$  phase has lesser proportion of silica spheres than either the N phase or  $I_1$  phase, and the  $I_1$  phase has the most of silica spheres among these three phases.

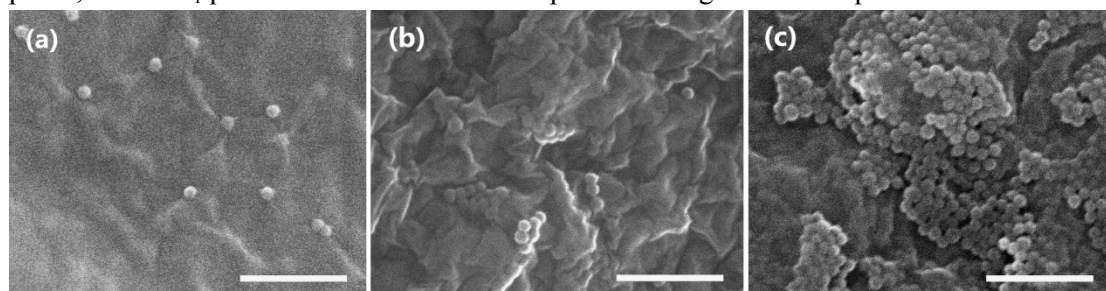

Fig.S1 SEM graph of different phases. (a)  $I_2$  phase, (b) N phase, and (c)  $I_1$  phase. The scale bars in (a) (b) and (c) are 1  $\mu\text{m}$ .

### The influence of platelet's polydispersity on phase transition in pure platelet suspensions

Fig S2 presents the influence of platelet's polydispersity on I-N transition in a pure platelet system, which were obtained by Mejia.<sup>1</sup> It was found that for ZrP (TBA) system, the polydispersity causes the increasing of the I-N transition concentration and broadens the coexistence region of the transition (the polydispersity of ZrP platelets we used is 0.13 with an aspect ratio (L/D) at 0.0021). In consistency with previous data, we obtained an I-N transition at  $\Phi_{I-N} = 0.0061 \sim 0.0088$  for the pure ZrP platelets with a polydispersity of 0.13, which matched with the red dash curve in Fig. S2. However, for the platelet-sphere mixtures, neither theory nor systematic experimental study of the polydispersity influence is available yet.

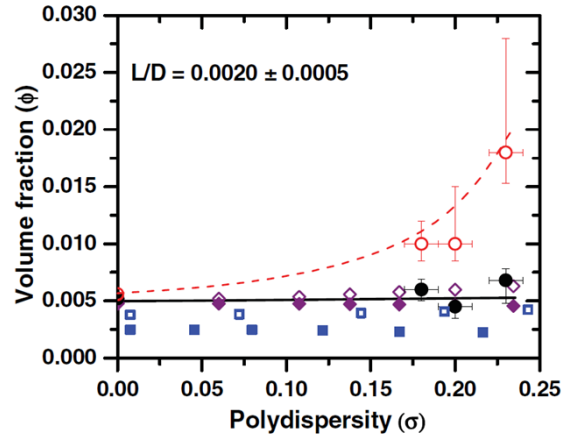

Fig. S2. (Color online) Volume fraction ( $\Phi$ ) (the solid black circles: isotropic and open red-gray circles: nematic) -of the cloud phases as a function of polydispersity ( $\sigma$ ) at fixed aspect ratios of ZrP around  $0.0020 \pm 0.0005$ . The concentrations at zero polydispersity for both graphs were obtained from simulations of Fartaria and Sweatman. The lines are guides for the eye. The solid and open blue-black squares are the theoretical  $\Phi_I$  and  $\Phi_N$ , respectively, from Sun et al. using a DFT calculation with Zwanzig approximation. The solid and the open purple-black diamonds are the theoretical  $\Phi_I$  and  $\Phi_N$ , respectively, from Bates and Frenkel for infinitely thin plates.

### The observation of N-N (nematic-nematic) demixing

The phase transitions in mixtures with a size ratio of spheres over platelet at 0.013 were also observed. Increasing the concentration of silica to a relative high value, a nematic-nematic demixing occurred. Fig. S3(a) shows two series of samples with N-N demixing when silica sphere concentration reached 1.78 and 2.00 wt%. The different phases were indicated in Fig. S3(b).

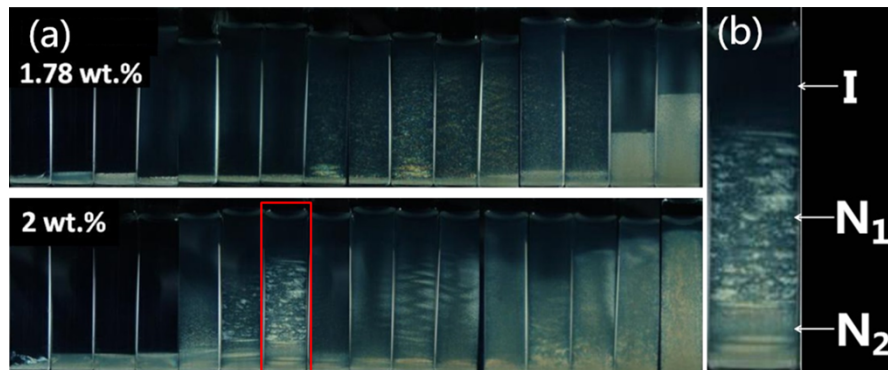

Fig.S3 (a) Photographs of ZrP/silica suspensions between crossed polarizers. From left to right, ZrP volume fraction is 0.0009, 0.0018, 0.0027, 0.0036, 0.0045, 0.0054, 0.0063, 0.0070, 0.0081, 0.009, 0.01, 0.0108, 0.0117, 0.0126, 0.0153, and 0.018, respectively. The error bar is  $\pm 0.00011$ . From top to bottom, silica concentration corresponds to 1.78, and 2.00wt.%, respectively. The error bar is  $\pm 0.003$ . (b) Labeling of the different phases. The volume fraction of ZrP and silica concentration of the sample are 0.0063 and 2.00wt.% respectively.

For a further analysis,  $N_1$  was visualized under an optical microscope coupled with crossed polarizers and compared with  $N_2$ . The texture of  $N_1$  observed between cross polarizers displays dark brushes having irregular curved shapes corresponding to extinction

positions of the nematic liquid crystals. Disclinations of  $s = \pm 1/2$  and  $s = \pm 1$  are observable (Fig. S4a). The texture of  $N_2$  displays a uniform domain and strong birefringence (Fig.S4b). As predicted by Lekkerkerker et al.,<sup>2</sup> the  $N_1$ - $N_2$  coexistence is originated from a competition among translational and orientational entropy (favoring mixed state) and depletion interaction (favoring demixing).  $N_1$  is a phase characterized of smaller liquid crystal domains in contrast to  $N_2$ , which is a birefringent closed-packed phase.

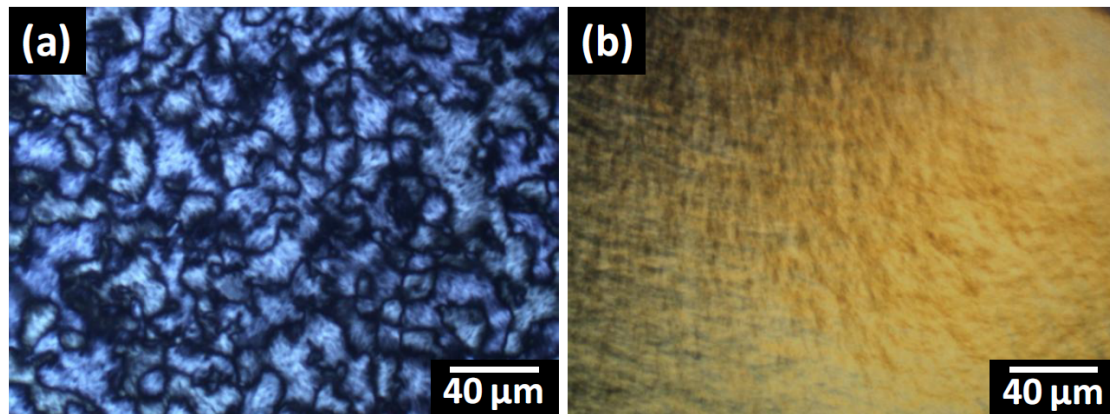

Fig. S4 Cross-polarized optical microscopic images of nematic Schlieren textures (a)  $N_1$ ,  $\phi_{plate} = 0.0081$  (b)  $N_2$ ,  $\phi_{plate} = 0.018$ . Both silica concentration of the samples are 1.78 wt.%. The micrographs were taken using a Nikon microscope TE-2000U with crossed polarizers and 4 $\times$  magnification.

## References

- [1] A. F. Mejia, Y.-W. Chang, R. Ng, M. Shuai, M. S. Mannan and Z. Cheng, Physical Review E, 2012, 85, 061708.
- [2] F. M. van der Kooij and H. N. W. Lekkerkerker, Physical Review Letters, 2000, 84, 781-784
